# Supplementary material for: Heterogeneity of resistance mutations detectable by next-generation sequencing in TKI-treated lung adenocarcinoma
Source: PubMed Central journal article supplement (PMC5216719; doi:10.18632/oncotarget.9931), 2016-06-09
Supplement: oncotarget-07-45237-s001.pdf [file oncotarget-07-45237-s001.pdf]

## Heterogeneity of resistance mutations detectable by next-generation sequencing in TKI-treated lung adenocarcinoma

### Supplementary Materials

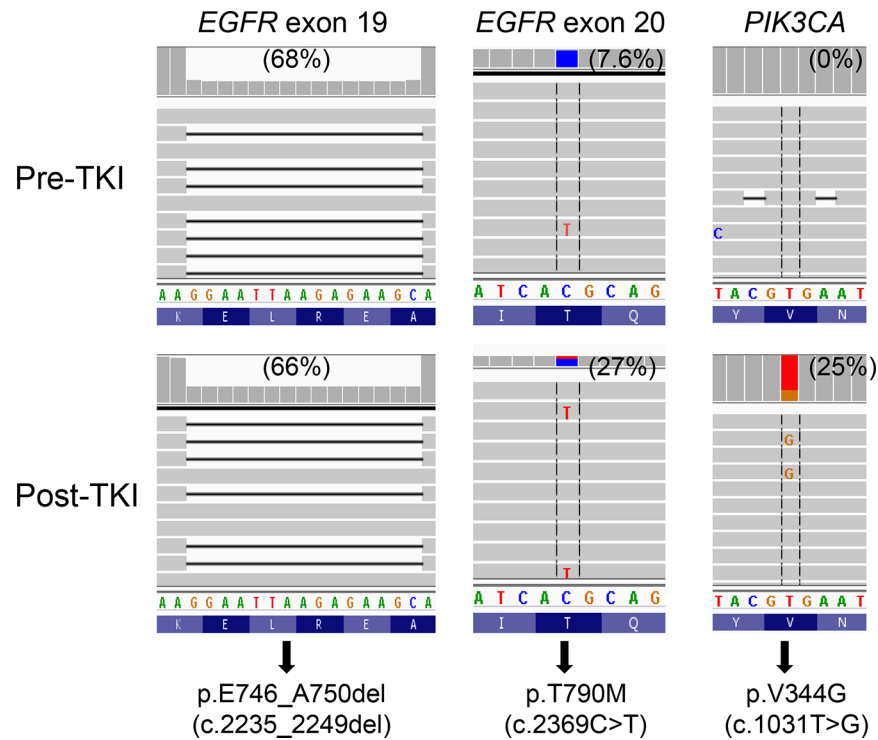

**Supplementary Figure S1: NGS analysis of pre-TKI (upper panel) and post-TKI (lower panel) specimens of patient 3.** *PIK3CA* p.V344G mutation was present only in the post-TKI specimen. Percentage in the parentheses indicates mutant allele frequency.

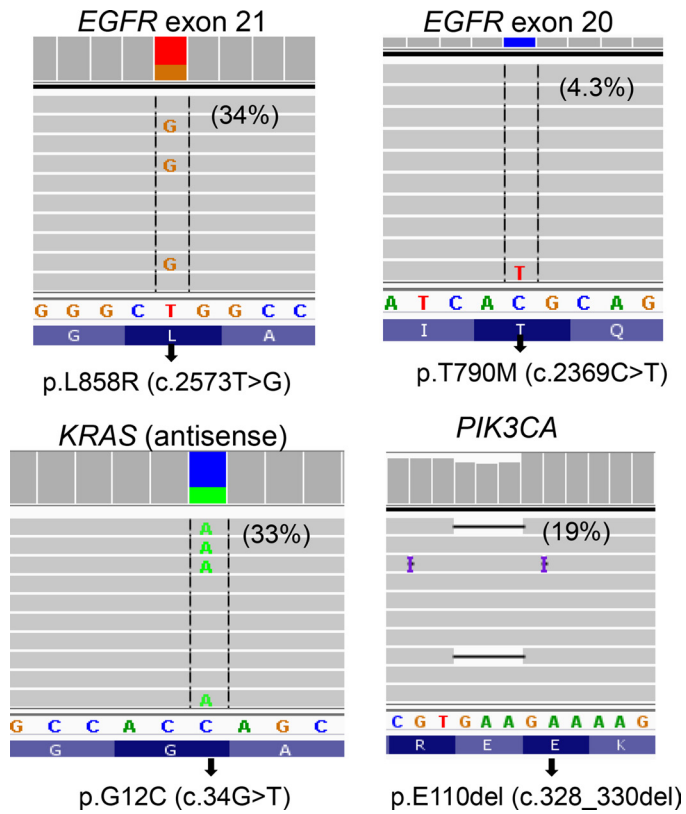

**Supplementary Figure S2: NSG analysis of specimens 28.** Percentage in the parentheses indicates mutant allele frequency (MAF).

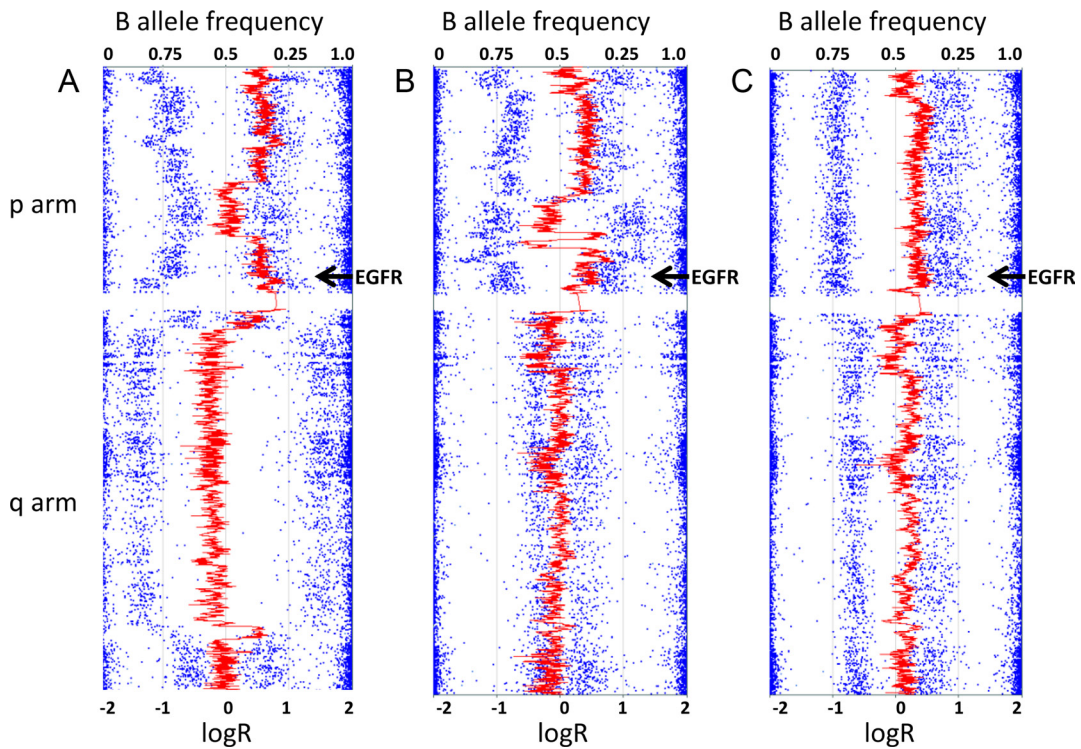

**Supplementary Figure S3: SNP array analysis of specimens 7(A), 34(B) and 3(C).** SNP array showed gain of chromosome 7p including the *EGFR* gene region.

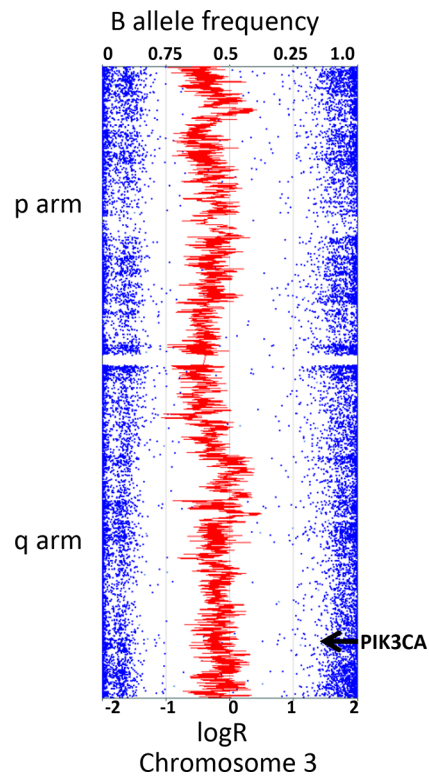

**Supplementary Figure S4: SNP array analysis of the pre-TKI specimen of patient 4.** SNP array showed copy neutral loss of heterozygosity (loss of the wild-type allele and duplication of the mutant allele) of chromosome 3q containing the *PIK3CA* gene.

**Supplementary Table S1: Mutant allele frequency of lung cancer panel (LCP) controls<sup>a</sup>**

| Gene/Mutation (cell line) <sup>b</sup>   | LCP control 1 <sup>c</sup> | LCP control 2 <sup>c</sup> | LCP control 3 <sup>c</sup> |
|------------------------------------------|----------------------------|----------------------------|----------------------------|
|                                          | (n = 61)                   | (n = 20)                   | (n = 31)                   |
| <i>AKT</i> /p.E17K (KU-19-19)            | 30 + 4.0%                  | 24.2 + 3.0%                | 7.4 + 0.8%                 |
| <i>AKT</i> /p.E49K (KU-19-19)            | 32.9 + 2.6%                | 24.1 + 2.0%                | 8.8 + 1.3%                 |
| <i>EGFR</i> /p.T790M (NCI-1975)          | 30.1 + 1.9%                | 21.1 + 1.2%                | 9.0 + 1.5%                 |
| <i>EGFR</i> /p.L858R (NCI-1975)          | 21.9 + 3.1%                | 12.8 + 2.0%                | 5.8 + 0.9%                 |
| <i>ERBB2</i> /p.G776delinsVC (NCI-H1781) | NI                         | 32.0 + 3.4%                | NI                         |
| <i>ERBB2</i> /p.G776V (OVCAR-8)          | 6.8 + 0.6%                 | NI                         | 8.5 + 0.9%                 |

Abbreviations: n; number of times the control was run; NI: mutation not included.

<sup>a</sup>Results of the *BRAF*, *KRAS*, *NRAS* and *PIK3CA* mutations have been reported previously [20].

<sup>b</sup>p.E17K: c.49G > A; E49K: c.145G > A; p.T790: c.2369C > T; p.L858R: c.2573T > G; p.G776delinsVC: 2326\_2327insTGT; p.G776V: c.2327G > T.

<sup>c</sup>mean ± standard deviation.

**Supplementary Table S2: Forty-one patients with post-TKI specimens tested by NGS**

| Case <sup>a</sup> | Tissues                | Pathology <sup>b</sup>      | EGFR mutation before TKI <sup>c</sup> |
|-------------------|------------------------|-----------------------------|---------------------------------------|
| 1                 | lung/biopsy            | adenocarcinoma              | Exon 19 deletion (outside)            |
| 2                 | pleura/biopsy          | adenocarcinoma              | L858R (Sanger)                        |
| 3A                | right pleural effusion | adenocarcinoma              | E746_A750del (Sanger)                 |
| 3B                | breast/biopsy          | adenocarcinoma              |                                       |
| 3C                | left pleural effusion  | adenocarcinoma              |                                       |
| 4A                | lung/FNA               | adenocarcinoma <sup>b</sup> | A763_Y764insFQEA (Sanger)             |
| 4B <sup>a</sup>   | lung/FNA               | adenocarcinoma <sup>b</sup> |                                       |
| 4C                | pleural effusion       | adenocarcinoma <sup>b</sup> |                                       |
| 5                 | lung/biopsy            | adenocarcinoma              | E746_A750del (Sanger)                 |
| 6                 | lung/resection         | adenocarcinoma              | E746_A750del (Sanger)                 |
| 7                 | liver/biopsy           | adenocarcinoma              | L858R (Sanger)                        |
| 8                 | lymph node/biopsy      | adenocarcinoma              | Exon 19 deletion (outside)            |
| 9                 | ascites                | adenocarcinoma              | EGFR (outside)                        |
| 10                | pleural effusion       | adenocarcinoma              | L747_A750delinsP (NGS)                |
| 11                | soft tissue/biopsy     | small cell carcinoma        | L858R (Sanger)                        |
| 12                | lung/BAL               | adenocarcinoma              | E746_A750del (NGS)                    |
| 13                | liver/biopsy           | adenocarcinoma              | E746_A750del (outside)                |
| 14                | lung/biopsy            | adenocarcinoma              | L858R (NGS)                           |
| 15                | lymph node/FNA         | adenocarcinoma              | E746_S752delinsIV and G724S (outside) |
| 16 <sup>a</sup>   | liver/biopsy           | adenocarcinoma              | EGFR (outside)                        |
| 17                | liver/biopsy           | adenocarcinoma              | G719C and S768I (Sanger)              |
| 18                | lymph node/biopsy      | adenocarcinoma              | EGFR (outside)                        |
| 19A <sup>a</sup>  | liver/FNA              | small cell carcinoma        | p.E746_A750del (NGS)                  |
| 19B               | pleural effusion       | adenocarcinoma              |                                       |
| 19C               | liver/biopsy           | small cell carcinoma        |                                       |
| 20 <sup>a</sup>   | lung/biopsy            | adenocarcinoma              | L858R (NGS)                           |
| 21                | lymph node/biopsy      | adenocarcinoma              | E746_A750del (outside)                |
| 22                | sacrum/biopsy          | adenocarcinoma              | E746_A750del (NGS)                    |
| 23                | lymph node/FNA         | adenocarcinoma              | E746_A750del (outside)                |
| 24A <sup>a</sup>  | bone/resection         | adenocarcinoma              | E746_T751delinsA and K754Q (outside)  |
| 24B               | chest wall/biopsy      | adenocarcinoma              |                                       |
| 25                | lung/biopsy            | adenocarcinoma              | Exon 19 deletion (outside)            |
| 26                | liver/biopsy           | adenocarcinoma              | E746_A750del (NGS)                    |
| 27                | liver/biopsy           | adenocarcinoma              | L858R (NGS)                           |
| 28                | lung/biopsy            | adenocarcinoma              | L858R (outside)                       |
| 29                | lymph node/FNA         | small cell carcinoma        | L747_P753delinsS (outside)            |
| 30                | lung/biopsy            | adenocarcinoma              | L747_T751delinP (outside)             |
| 31                | lung/biopsy            | adenocarcinoma              | L747_P753delinsQ (outside)            |
| 32                | lung/biopsy            | adenocarcinoma              | E746_A750del (outside)                |
| 33                | lung/biopsy            | adenocarcinoma              | E746_A750del (NGS)                    |
| 34                | lymph node/FNA         | adenocarcinoma              | E746_S752delinsV (NGS)                |
| 35                | liver/biopsy           | adenocarcinoma              | L747_P755delinsSKG (NGS)              |
| 36                | lung/biopsy            | adenocarcinoma              | L858R and E709K (NGS)                 |
| 37                | lung/biopsy            | adenocarcinoma              | L747_S753delinsS (NGS)                |

|    |               |                |                            |
|----|---------------|----------------|----------------------------|
| 38 | lung/biopsy   | adenocarcinoma | E709_T710delinsD (outside) |
| 39 | lung/biopsy   | adenocarcinoma | E746_A750del (outside)     |
| 40 | pleura/biopsy | adenocarcinoma | L858R (outside)            |
| 41 | lung/biopsy   | adenocarcinoma | L858R (outside)            |

<sup>a</sup>Five specimens failed NGS testing.

<sup>b</sup>In patient 4, small cell carcinoma was present in the pericardial effusion and in left pleura and mediastinum autopsy specimens.

<sup>c</sup>Parentheses indicate source of sequence information. Outside, *EGFR* mutations were determined at other labs; NGS, Johns Hopkins NGS assay; Sanger, Johns Hopkins Sanger sequencing assay. The details of *EGFR* mutations were not known in patients 9, 16 and 18.

### Supplementary Table S3: *cis* or *trans* relationship between TKI-sensitizing and p.T790M mutations<sup>a</sup>

| Specimens | Mutant allele frequency |                           | SNP allele linked with mutant allele <sup>c</sup> |         |
|-----------|-------------------------|---------------------------|---------------------------------------------------|---------|
|           | TKI-sensitive mut       | SNP (allele) <sup>b</sup> | TKI-sensitive mut                                 | p.T790M |
| 7         | 74%                     | 79% (G)                   | G                                                 | G       |
| 21        | 57%                     | 63% (G)                   | G                                                 | G       |
| 25        | 56%                     | 63% (A)                   | A                                                 | A       |
| 34        | 67%                     | 73% (A)                   | A                                                 | A       |
| 37        | 91%                     | 90% (A)                   | A                                                 | A       |
| 41        | 52%                     | 64% (A)                   | A                                                 | A       |

<sup>a</sup>The *cis* or *trans* relationship between TKI-sensitive and p.T790M mutations was deduced using genotyping of SNP rs1050171 (c.2361G > A) within exon 20 of the *EGFR* gene in 6 specimens with a 50% or more TKI-sensitive mutant allele frequency, presumably due to amplification of the *EGFR* gene.

<sup>b</sup>The nucleotide in the parenthesis indicates the genotype carrying the allele frequency.

<sup>c</sup>The SNP allele (A or G) linked with the TKI-sensitive mutant allele was predicted based on the concordant frequencies between TKI-sensitive mutant allele and SNP allele. The SNP allele linked with the p.T790M allele was observed based on the NGS analysis of an amplicon encompassing both SNP and p.T790M positions (c.2361 and c.2369, respectively).

### Supplementary Table S4: Reportable ranges of *AKT*, *ERBB2* and *EGFR* genes

| Gene                 | cDNA position                 | Codon                     |
|----------------------|-------------------------------|---------------------------|
| <i>AKT</i>           |                               |                           |
| exon 3               | 47 to 156                     | 16 to 52                  |
| exon 6               | 459 to 547                    | 153 to 183                |
|                      |                               |                           |
| <i>ERBB2</i>         |                               |                           |
| exon 19              | 2166 to 2217                  | 722 to 739                |
| exon 20              | 2218 to 2301                  | 740 to 767                |
| exon 21              | 2425 to 2556                  | 809 to 852                |
|                      |                               |                           |
| <i>EGFR</i>          |                               |                           |
| exon 3               | 279 to 370                    | 93 to 124                 |
| exon 7               | 835 to 889                    | 279 to 297                |
| exon 15              | 1723 to 1804                  | 575 to 602                |
| exon 18              | 2077 to 2179                  | 693 to 727                |
| exon 19              | 2185 to 2283                  | 729 to 761                |
| exon 20 <sup>a</sup> | 2284 to 2398 and 2406 to 2469 | 762 to 800 and 802 to 823 |
| exon 21              | 2559 to 2625                  | 853 to 875                |

<sup>a</sup>Two amplicons.

**Supplementary Table S5: cDNA changes for the mutations documented in Table 1 and Supplementary Table S1**

| Case | <i>EGFR</i> (NM_005228)                                                                              | <i>PIK3CA</i> (NM_006218) | <i>KRAS</i> (NM_033360) |
|------|------------------------------------------------------------------------------------------------------|---------------------------|-------------------------|
| 1    | E746_A750del (c.2236_2250del); T790M (c.2369C > T)                                                   |                           |                         |
| 2    | L858R (c.2573T > G); T790M (c.2369C > T)                                                             |                           |                         |
| 3    | E746_A750del (c.2235_2249del); T790M (c.2369C > T)                                                   | V344G (c.1031T > G)       |                         |
| 4    | A763_Y764insFQEA (c.2284-5_2290dup); T790M (c.2369C > T)                                             | G1049R (c.3145G > C)      |                         |
| 5    | E746_A750del (c.2236_2250del); T790M (c.2369C > T)                                                   | E453K (c.1357G > A)       |                         |
| 6    | E746_A750del (c.2235_2249del); T790M (c.2369C > T)                                                   |                           |                         |
| 7    | L858R (c.2573T > G); T790M (c.2369C > T)                                                             |                           |                         |
| 8    | E746_A750del (c.2235_2249del); T790M (c.2369C > T)                                                   |                           |                         |
| 9    | L858R (c.2573T > G); K860I (c.2579A > T); T790M (c.2369C > T)                                        | H1047L (c.3140A > T)      |                         |
| 10   | L747_A750delinsP (c.2239_2248delinsC); S768_V769delinsIL (c.2303_2305delinsTTT); T790M (c.2369C > T) | E542K (c.1624G > A)       |                         |
| 11   | L858R (c.2573T > G)                                                                                  |                           |                         |
| 12   | E746_A750del (c.2235_2249del); T790M (c.2369C > T)                                                   |                           |                         |
| 13   | E746_A750del (c.2235_2249del)                                                                        |                           |                         |
| 14   | L858R (c.2573T > G)                                                                                  |                           |                         |
| 15   | E746_S752delinsV (c.2237_2255delinsT); G724S (c.2170G > A)                                           |                           |                         |
| 16   | EGFR (outside)                                                                                       |                           |                         |
| 17   | G719C (c.2155G > T); S768I (c.2303G > T); T790M (c.2369C > T)                                        |                           |                         |
| 18   | L747_S752del (c.2239-2256del); T790M (c.2369C > T)                                                   |                           |                         |
| 19   | E746_A750del (c.2235_2249del); T790M (c.2369C > T)                                                   |                           |                         |
| 20   | L858R (c.2573T > G)                                                                                  |                           |                         |
| 21   | E746_A750del (c.2235_2249del); T790M (c.2369C > T)                                                   |                           |                         |
| 22   | E746_A750del (c.2236_2250del); T790M (c.2369C > T)                                                   |                           |                         |
| 23   | E746_A750del (c.2236_2250del); T790M (c.2369C > T)                                                   |                           |                         |
| 24   | E746_T751delinsA (c.2235_2251delinsAG); K754Q (c.2260A > C); T790M (c.2369C > T)                     | Y1021C (c.3062A > G)      |                         |
| 25   | E746_A750del (c.2235_2249del); T790M (c.2369C > T)                                                   |                           |                         |
| 26   | E746_A750del (c.2235_2249del)                                                                        |                           |                         |
| 27   | L858R (c.2573T > G); T790M (c.2369C > T)                                                             |                           |                         |
| 28   | L858R (c.2573T > G); T790M (c.2369C > T)                                                             | E110del (c.328_330del)    | G12C (c.34G > T)        |
| 29   | L747_P753delinsS (c.2240_2257del)                                                                    | E545K (c.1633G > A)       |                         |
| 30   | L747_T751delinP (c.2239_2251delinsC); T790M (c.2369C > T)                                            | H1047R (c.3140A > T)      |                         |
| 31   | L747_P753delinsQ (c.2239_2259insCAA); T790M (c.2369C > T)                                            |                           |                         |
| 32   | E746_A750del (c.2236_2250del); T790M (c.2369C > T)                                                   |                           |                         |
| 33   | E746_A750del (c.2235_2249del); T790M (c.2369C > T)                                                   |                           |                         |

|    |                                                               |                     |  |
|----|---------------------------------------------------------------|---------------------|--|
| 34 | E746_S752delinsV (c.2237_2255delinsT); T790M (c.2369C > T)    |                     |  |
| 35 | L747_A755delinsSKG (c.2240_2264delinsCGAAAGG)                 | E545K (c.1633G > A) |  |
| 36 | L858R (c.2573T > G); E709K (c.2125G > A); T790M (c.2369C > T) |                     |  |
| 37 | L747_P753delinsS (c.2240_2257del); T790M (c.2369C > T)        |                     |  |
| 38 | E709_T710delinsD (c.2127_2129del)                             |                     |  |
| 39 | E746_A750del (c.2235_2249del); T790M (c.2369C > T)            |                     |  |
| 40 | L858R (c.2573T > G); T790M (c.2369C > T)                      |                     |  |
| 41 | L858R (c.2573T > G); T790M (c.2369C > T)                      |                     |  |
